CORRECTION

# Correction: An event related potential study of inhibitory and attentional control in Williams syndrome adults

The *PLOS ONE* Staff

## Notice of Republication

This article was republished on April 27, 2017 to correct an error in the title introduced during the typesetting process. The publisher apologizes for this error. Please download this article again to view the correct version. The originally published, uncorrected article and the republished, corrected article are provided here for reference.

## Supporting information

**S1 File. Originally published, uncorrected article.**

(PDF)

**S2 File. Republished, corrected article.**

(PDF)

## Reference

1. Greer JMH, Hamilton C, McMullon MEG, Riby DM, Riby LM (2017) An event related potential study of inhibitory and attentional control in Williams syndrome adults. *PLoS ONE* 12(2): e0170180. <https://doi.org/10.1371/journal.pone.0170180> PMID: 28187205

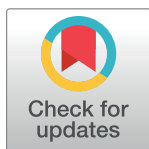

## OPEN ACCESS

**Citation:** The *PLOS ONE* Staff (2017) Correction: An event related potential study of inhibitory and attentional control in Williams syndrome adults. *PLoS ONE* 12(5): e0177587. <https://doi.org/10.1371/journal.pone.0177587>

**Published:** May 8, 2017

**Copyright:** © 2017 The PLOS ONE Staff. This is an open access article distributed under the terms of the [Creative Commons Attribution License](https://creativecommons.org/licenses/by/4.0/), which permits unrestricted use, distribution, and reproduction in any medium, provided the original author and source are credited.
